# Supplementary material
Source: PubMed Central journal article supplement (PMC4018918)
Supplement: AEM.00464-14_zam999105356so1.pdf [file AEM.00464-14_zam999105356so1.pdf]

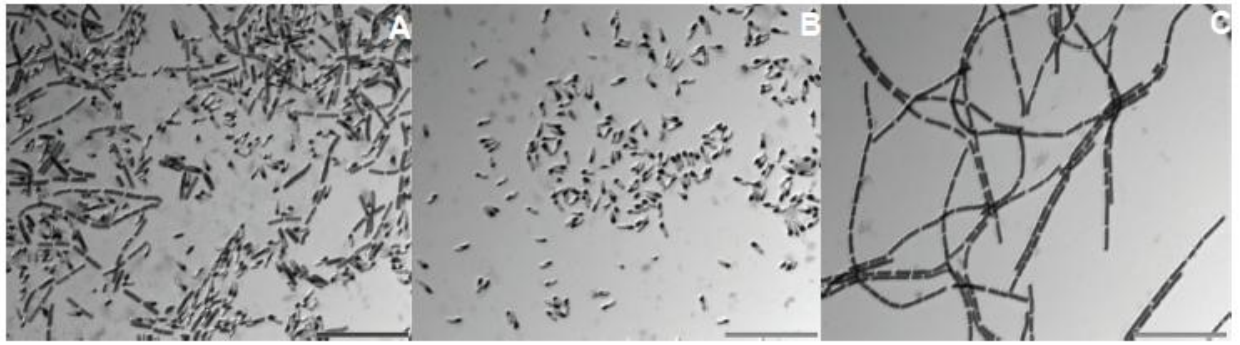

**Fig S1** Light microscopy images (100X) of *B. thuringiensis* DB27 cultures used in *C. elegans* killing assays. A. Culture which kills nematodes in 16 hours and marked “BT DB27 veg cells/spores” in Fig 1A. Mixture of vegetative cells (often represented by chains of cells) and spores is shown. B. Culture which kills worms in 10 hours and marked “BT DB27 spores” in Fig 1A. Pure spores are shown. C. Culture which is not virulent to nematodes and marked “BT DB27 veg cells” in Fig 1A. Pure vegetative cells that form long chains are shown. Scale bar is 20  $\mu\text{m}$ .

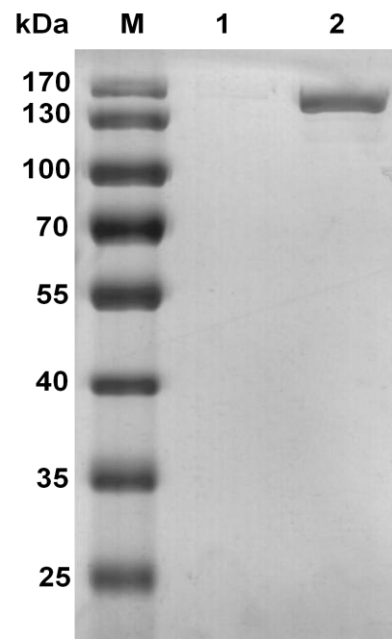

**Fig S2** SDS-PAGE confirmation of Cry toxin production. Spore-crystal mixtures of *B. thuringiensis* DB27 (lane 2) and of plasmidless strain (lane 1) grown in BT sporulation medium were treated with alkaline solubilization buffer. Obtained proteins were resolved using SDS-PAGE, stained with Coomassie Brilliant Blue.

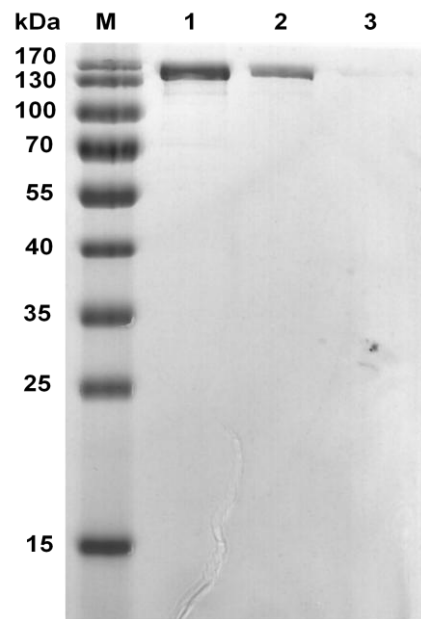

**Fig S3** SDS-PAGE image of Cry proteins isolated from *B. thuringiensis* DB27 pure spores (lane 1), mixed culture of spores and vegetative cells (lane 2), pure vegetative cells (lane 3). Analyzed samples were normalized to total protein content. Vegetative cells do not produce Cry proteins, spores showed the highest production.

**Fig S4** Multiple sequence alignment (Clustal Omega) of three novel Cry21 protoxins discovered in this study in comparison with Cry21Ba1 toxin, which shows the highest similarity to all three proteins

*Fast, scalable generation of high-quality protein multiple sequence alignments using Clustal Omega* Sievers F, Wilm A, Dineen DG, Gibson TJ, Karplus K, Li W, Lopez R, McWilliam H, Remmert M, Söding J, Thompson JD, Higgins DMolecular Systems Biology 7 Article number: 539 [doi:10.1038/msb.2011.75](https://doi.org/10.1038/msb.2011.75)

An \* (asterisk) indicates positions which have a single, fully conserved residue.  
 A : (colon) indicates conservation between groups of strongly similar properties.  
 A . (period) indicates conservation between groups of weakly similar properties.

Colours mark the residues according to their physicochemical properties:

- RED – small and hydrophobic
- BLUE – acidic
- MAGENTA – basic
- GREEN - Hydroxyl + sulfhydryl + amine

|          |                                                                |     |
|----------|----------------------------------------------------------------|-----|
| Cry21Gal | MADLSNIYPIPYNTVSSQYFYQNQLDVPNGENNPLTKNEQLIEDFKKTLKEKPGNLLTA    | 60  |
| Cry21Hal | MVVLNNIYKGPYNVLAATPTF----LDTQEGSFDDLITDLQSAWDFNFKT-----GAFS--  | 49  |
| Cry21Ba1 | MADLTELPSYHNVLARPIR----LDSIFDPPIDIFNALKGGWEEFAKT-----GYKD-P    | 50  |
| Cry21Fa1 | MVILNDIYKRPYNVLANPPIIVE-EGTTPGSFMDIFEDIKKAFEEFQKT-----GNLQ--   | 52  |
|          | *. *.:** :*.: :                                                |     |
| Cry21Gal | GADIFKDIYNAI-DKQEVVDYLSLTTSILGLVSI FVPEIGFVAPLLGLFYRAMG---TGNT | 116 |
| Cry21Hal | -TEVLNQAYKMYENGGSF DYALALFKAGITVVGSVFPEIAPAVPFITMIANFIFPHLFGGT | 108 |
| Cry21Ba1 | LEQHLKIAWNAS-QNGTIDYLALTKASISFIGL-IPDADAVVPPINMFVDFIFPKLFGEG   | 108 |
| Cry21Fa1 | -TTALQQAWNAY-QGGTIDYLALLKSSLSLVGLLIPGGEAAVPPIGMFLDFVFPKLF GAS  | 110 |
|          | :: : : .***:* .: : .: .*                                       |     |
| Cry21Gal | TSDPNMNDIFALKPKIEEMIDS KLTQEEDFLNKTVEGLQDNLSNYRNAVRTFTIAKQS    | 176 |
| Cry21Hal | SDN--KQTIINI DDEVNRLNLERLEQDKKDELQGYLNGMGNNIKDFGQKIVDTL FNS--  | 164 |
| Cry21Ba1 | SQQNSQAQPFELIIEKVKIIVDQEFRNFTLNTLLNDLDGMQTTLEHFQNDVQIAICQGEQ   | 168 |
| Cry21Fa1 | GSN--SDNVFPIIIKEVKQWTNQGFENFTLNSLNNTLIGIQSNISSFNEMIQIAICQEET   | 168 |
|          | :. : .: : : : .: : : *                                         |     |
| Cry21Gal | KNTDKI-----KAAKTFLQRTIDIIDQIFTNQLAHLSSVHVKL                    | 215 |
| Cry21Hal | -----NKKPLIPNSHSLHDVYQSYSGFIGNVNTVIDQFR-----LKSYEKM            | 205 |
| Cry21Ba1 | PGLILD-EKHPPCTPTKNHLVSVKESFKNARTS IETVLPFKNPMTNKTPDFNSD TVLL   | 227 |
| Cry21Fa1 | PGDDKSSTPSPLCTPTAEHLKNVWTQFQIARTQIEASLPYFKNPMQLDASADPQSNYIML   | 228 |
|          | . : : :                                                        |     |
| Cry21Gal | SLPYYAMMGTLYLALLKDTITNGVEWGYEDVVL-----NTKKYELREKIKTNTER        | 265 |
| Cry21Hal | SLPYYCLAVTLVNLVYRDFIRYGGKWIYTTIDETDYTTYENYINTAIKNMNQLTSKATKY   | 265 |
| Cry21Ba1 | TLPMYTTAATLNLILHQGYIQFVERWKSVDYDEAFI-----NQTKADLQHRIQEYSTT     | 280 |
| Cry21Fa1 | TLPLYTMAATLNLTLYQSFIQFADKHKDVIYDLGTM-----EQTKANHRKKNIKSYTAT    | 281 |
|          | :** * ** * : : * . : : .: .:                                   |     |



|          |                                                                                              |      |
|----------|----------------------------------------------------------------------------------------------|------|
| Cry21Gal | QAKQLSKARNVLVGGNF <del>FKGHWLGRKATMVANHDLFKGDHLLLPPTLYPSYAYQKID</del>                        | 887  |
| Cry21Hal | QAKQLSKARNVLVGGNF <del>FKGHEWVLRKATMVANHDLFKGDHLLLPPTLYPSYAYQKID</del>                       | 915  |
| Cry21Bal | QAKQLSKARNVLVGGNF <del>FKGHEWVLRGREATMIANHELFKGDHLLLPPTLYPSYAYQKID</del>                     | 939  |
| Cry21Fal | QAKQLSKTRNVLVGGNF <del>FKGHEWALGREATMVANHELFKGDHLLLPPTLYPSYAYQKID</del>                      | 927  |
|          | *****:****_*****:*_**:*:**:***:*****:*****:*****                                             |      |
| Cry21Gal | ESK <del>LQSNTRYTVSGFIAQSEHVEVVVSRYGKEVHDMLDVPYEEALPISSDESPNCKPAA</del>                      | 947  |
| Cry21Hal | ESK <del>LQPNTRYTVSGFVAQSEHLEVVVSRYGKEVHDMLDVPYEEALPISSDESPNCKPAA</del>                      | 975  |
| Cry21Bal | ESK <del>LKSNTRYTVSGFIAQSEHLEVIIVSRYGKEVHDMLDVPYEEALPISSDESPNCKPAT</del>                     | 999  |
| Cry21Fal | ESK <del>LKSNTRYTVSGFIAQSEHVEVIVSRYGKEVHDMLDVPYEEALPISSDESPNCKPAA</del>                      | 987  |
|          | ***: *****:*****:***:*****:*****:*****:*****:*****:*****                                     |      |
| Cry21Gal | CQCQSCDGS <del>KRDSHFFSYSIDVGSVQSDVNLGIELGLRITKPNGFAKISNLEIKEDRPLT</del>                     | 1007 |
| Cry21Hal | CQCSSCDGSQ <del>PDSHFFSYSIDVGSIQSDVNLGIEFGLRIAKPNGFAKISNLEIKEDRPLT</del>                     | 1035 |
| Cry21Bal | CQC <del>PSCDGSQPDHFFSYSIDVGSVQSDVNLGIEFGLRIAKPNGFAKISNLEIKEDRPLT</del>                      | 1059 |
| Cry21Fal | CQCSSCDGSQ <del>PDSHFFSYNDVGSVQSDVNLGIEFGLRIAKPNGFAKISNLEIKEDRPLT</del>                      | 1047 |
|          | *** *****: *****_*****:*****:*****:*****:*****:*****:*****                                   |      |
| Cry21Gal | EKEIKKVQRKE <del>QKWKAFDQEQTEVTARLQPTLDQINALYQNEWDWNSLHPVTTYQDLSA</del>                      | 1067 |
| Cry21Hal | EKEIKKVQRKE <del>QKWKAFDQEQA EVAATLQPTLDQINALYQNEWDWNSLHPVTTYQHLSA</del>                     | 1095 |
| Cry21Bal | DQEIKKIQRKE <del>QKWKAFDQEQA EVAATFQPTLDQINALYQNEWDWNSLHPVTTYQHLSA</del>                     | 1119 |
| Cry21Fal | EKEIKKVQRKE <del>QKWKAFDQEQA ELATTLQPTLDQINALYQNEWDWNSLHSHVTTYQHLSA</del>                    | 1107 |
|          | : :*****:*****:*****:***: : :*****:*****_*** *****_***                                       |      |
| Cry21Gal | VVVP <del>TLPKQRHWFMEDRKGESGLTQQFQQALDRAFQQIEEQNLIHNGSFNGLTDWTVT</del>                       | 1127 |
| Cry21Hal | VVLP <del>TLPKQRHWFMEDREGHEHYSVTQQFQQALDRAFQQIEEQNLIHNGSFANGLTDWTVT</del>                    | 1155 |
| Cry21Bal | VVLP <del>TLPKQRHWFMEDREGHEHYGVTQQFQQALDRGFQQIEEQNLIHNGSFANGLTDWTVT</del>                    | 1179 |
| Cry21Fal | VVLPALPKQR <del>HWFMEDREGHEHYGVTQQFQQALDRAFQQIEEQNLIHNGSFANGLTDWTVT</del>                    | 1167 |
|          | ***: * :*****:*****:*** _:*****_*****:*****:*****:*****                                      |      |
| Cry21Gal | GDAQLTIF <del>DEDPVLELAHWASVSQTIEIMDFEET<del>TEYKLRVRGKKG</del>TVTVQHGE<del>EELE</del></del> | 1187 |
| Cry21Hal | GDAQLTIF <del>DEDPVLELAHWASVSQTIEIMDFEED<del>TEYKLRVRGKKG</del>TVTVQHGE<del>EELE</del></del> | 1215 |
| Cry21Bal | GDAQLTIF <del>DEDPVLELAHWASVSQTIEIMDFEET<del>TEYKLRVRGKKG</del>TVTVQHGE<del>EELE</del></del> | 1239 |
| Cry21Fal | GDAQLTIF <del>DEDPVLELAHWASVSQTIEIMDFEED<del>TEYKLRVRGKKG</del>TVTVQHGE<del>EELE</del></del> | 1227 |
|          | *****:*****:*****:*****:*****:*****:*****:*****:*****                                        |      |
| Cry21Gal | TMTFN <del>TTSFTTQEQTFFYFEGKTVDVHVQSENNTFLVDSVELIEVV<del>EE</del></del> - 1234               |      |
| Cry21Hal | TMTFN <del>TTSFTTQEQTFFYFEGD<del>TVDVHVQSENNTFLVDSVELIEVV<del>EEE</del></del></del> 1263     |      |
| Cry21Bal | TMTFN <del>TTSFTTQEQTFFYFEGD<del>TVDVHVQSENNTFLVDSVELIEVV<del>EE</del></del></del> - 1286    |      |
| Cry21Fal | TMTFN <del>TTSFTTQEQTFFYFEGNTVDVHVQSENNTFLVDS<del>AELIEVV<del>EE</del></del></del> 1275      |      |
|          | *****:*****_*****:*****_*****                                                                |      |

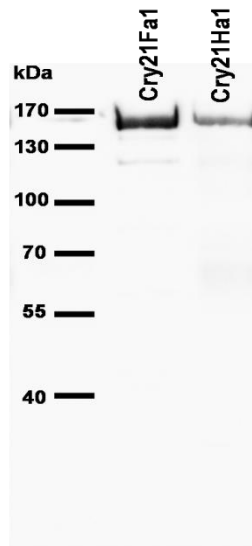

**Fig S5** Representative western blot image of purified Cry21Fa1 and Cry21Ha1 proteins. Western blot was used to confirm that size-selected proteins in chromatography-separated fractions are proteins of interest. Anti-His primary antibodies were used in 1:1000 dilution. Horseradish peroxidase-conjugated secondary antibody (1:5000) and enhanced chemiluminescence were used to visualize the signal.



**Table S1** Log-rank statistical analysis of survival curves

| Figures | Treatment <sup>a</sup>                                                                                                              | Mean survival $\pm$ SD <sup>b</sup>                                                                                                                                                            | Comparison <sup>c</sup>                                                                                                                        | P value <sup>d</sup>                                                               |
|---------|-------------------------------------------------------------------------------------------------------------------------------------|------------------------------------------------------------------------------------------------------------------------------------------------------------------------------------------------|------------------------------------------------------------------------------------------------------------------------------------------------|------------------------------------------------------------------------------------|
| 1A      | DB27 veg. cells<br>DB27 mix cells/spores<br>DB27 spores                                                                             | 20.0 $\pm$ 0.0 <sup>3</sup><br>10.7 $\pm$ 0.6 <sup>3</sup><br>5.4 $\pm$ 0.48 <sup>3</sup>                                                                                                      | Veg. cells vs mix cells/spores<br>Veg. cells vs spores<br>Mix cells/spores vs spores                                                           | <0.00001<br><0.00001<br><0.0001                                                    |
| 1G      | <i>C. elegans</i> N2<br><i>P. strongyloides</i><br><i>O. carolinensis</i>                                                           | 16.0 $\pm$ 0.0 <sup>3</sup><br>35.8 $\pm$ 3.79 <sup>3</sup><br>50.0 $\pm$ 4.1 <sup>3</sup>                                                                                                     | <i>C. elegans</i> N2 vs <i>P. strongyloides</i><br><i>C. elegans</i> N2 vs <i>O. carolinensis</i>                                              | <0.0001<br><0.0001                                                                 |
| 1H      | <i>C. elegans</i> N2<br><i>P. redivivus</i>                                                                                         | 10.7 $\pm$ 0.6 <sup>3</sup><br>7.8 $\pm$ 0.43 <sup>3</sup>                                                                                                                                     | <i>C. elegans</i> N2 vs <i>P. redivivus</i>                                                                                                    | <0.001                                                                             |
| 3A      | Vector<br>Cry21Fa1<br>Cry21Ga1<br>Cry21Ha1                                                                                          | n. a.<br>42.0 $\pm$ 2.23 <sup>2</sup><br>n. a.<br>84.4 $\pm$ 6.18 <sup>2</sup>                                                                                                                 | Vector vs Fa1<br>Vector vs Ga1<br>Vector vs Ha1<br>Fa1 vs Ha1                                                                                  | <0.00001 <sup>***</sup><br>0.82 <sup>**</sup><br><0.00001 <sup>**</sup><br><0.0001 |
| 3D      | Cry21Fa1+vector<br>Cry21Ha1+vector<br>Cry21Fa1+Cry21Ha1<br>Cry21Ha1+Cry21Ga1<br>Cry21Ga1+Cry21Fa1<br>Cry21Ha1+Cry21Fa1+<br>Cry21Ga1 | 83.3 $\pm$ 5.19 <sup>2</sup><br>109.2 $\pm$ 4.07 <sup>2</sup><br>55.0 $\pm$ 3.37 <sup>2</sup><br>104.4 $\pm$ 4.69 <sup>2</sup><br>80.2 $\pm$ 4.63 <sup>2</sup><br>63.9 $\pm$ 4.84 <sup>2</sup> | Fa1+v vs Fa1+Ha1<br>Ha1+v vs Fa1+Ha1<br>Fa1+v vs Ha1+v<br>Fa1+v vs Fa1+Ga1<br>Fa1+v vs Fa1+Ha1+Ga1<br>Ha1+v vs Ha1+Ga1<br>Ha1+v vs Fa1+Ha1+Ga1 | <0.0001<br><0.0001<br><0.001<br>0.612<br>0.014<br>0.525<br><0.0001                 |
| 3E      | N2 Cry21Fa1<br>N2 Cry21Ha1<br><i>nasp-1</i> cry21Fa1<br><i>nasp-1</i> cry21Ha1                                                      | 47.05 $\pm$ 1.23 <sup>2</sup><br>83.3 $\pm$ 6.26 <sup>2</sup><br>67.25 $\pm$ 4.66 <sup>2</sup><br>114.0 $\pm$ 4.88 <sup>2</sup>                                                                | N2 vs <i>nasp-1</i> Cry21Fa1<br>N2 vs <i>nasp-1</i> Cry21Ha1                                                                                   | <0.0001<br><0.001                                                                  |
| 4A      | N2 Cry21Fa1<br>N2 Cry21Ha1<br><i>bre-2</i> Cry21Fa1<br><i>bre-2</i> Cry21Ha1<br><i>bre-3</i> Cry21Fa1<br><i>bre-3</i> Cry21Ha1      | 42.8 $\pm$ 1.95 <sup>2</sup><br>84.4 $\pm$ 6.18 <sup>2</sup><br>44.0 $\pm$ 2.43 <sup>2</sup><br>89.6 $\pm$ 6.4 <sup>2</sup><br>44.8 $\pm$ 2.35 <sup>2</sup><br>93.6 $\pm$ 6.25 <sup>2</sup>    | N2 vs <i>bre-2</i> Fa1<br>N2 vs <i>bre-2</i> Ha1<br>N2 vs <i>bre-3</i> Fa1<br>N2 vs <i>bre-3</i> Ha1                                           | 0.804<br>0.532<br>0.552<br>0.303                                                   |
| 4B      | N2 wt<br><i>xbp-1</i><br><i>jun-1</i><br><i>pmk-1</i><br><i>kgb-1</i>                                                               | 41.6 $\pm$ 1.89 <sup>2</sup><br>34.4 $\pm$ 1.75 <sup>2</sup><br>34.4 $\pm$ 1.93 <sup>2</sup><br>27.6 $\pm$ 0.91 <sup>2</sup><br>38.8 $\pm$ 1.77 <sup>2</sup>                                   | N2 vs <i>xbp-1</i><br>N2 vs <i>jun-1</i><br>N2 vs <i>pmk-1</i><br>N2 vs <i>kgb-1</i>                                                           | 0.006<br>0.012<br><0.0001<br>0.223                                                 |

Mean survival and statistical significance were calculated for each experiment as detailed in Materials and Methods.

<sup>a</sup> Treatment indicates which nematode species, mutant genotype and/or toxins were analysed.

<sup>b</sup> Mean survival and standard error for indicated treatment. Each treatment was tested in at least three replicates and repeated at least two times. Superscript indicates the number of repetitions of that experiment. The reported mean is based on the average survival curve of the replicates of the representative experiment.

<sup>c</sup> Comparison shows which treatments are statistically compared.

<sup>d</sup> P value for a given comparison.



n. a. \* survival curves for these treatments are not completed, therefore it is not possible to calculate mean survival time

\*\* P values for time point 120 hours

\*\*\* P value for time point 48 hours

**Table S2** Potential virulence factors of *B. thuringiensis* DB27 detected by whole genome sequencing

| <b>Potential virulence factor</b> | <b>Function</b>               | <b>Quantity</b> | <b>Location</b> |
|-----------------------------------|-------------------------------|-----------------|-----------------|
| Microbial collagenase             | Peptidase M9                  | 1               | plasmid         |
| Hemolysin BL                      | enterotoxin                   | 3               | plasmid         |
| NheA, NheB, NheC                  | non-hemolytic enterotoxin     | 1               | chromosome      |
| Phospholipase (pipls, cerA, cerB) | lipase                        | 3               | chromosome      |
| Collagenase                       | Peptidase M9                  | 2               | chromosome      |
| Immune inhibitor A                | InhA peptidase M6 superfamily | 3               | chromosome      |
| Chitinase                         | chitinase                     | 2               | chromosome      |
| Lipase                            | lipase                        | 9               | chromosome      |
| Bacillolysin                      | Neutral protease              | 4               | chromosome      |
| Proteases                         | protease                      | >40             | chromosome      |
| Enhancin                          | mettaloprotease               | 1               | chromosome      |
| Hemolysin(CytK, Hly3)             | cytotoxins                    | 3               | chromosome      |

**Table S3** Features of *B. thuringiensis* DB27 plasmids and Cry toxins detected by whole genome sequencing

| <b>Plasmid name</b> | <b>Plasmid size, bp</b> | <b>Detected Cry toxins</b> | <b>% of protein similarity to known toxins</b> | <b>Designated new names</b> | <b>GenBank accession number</b> |
|---------------------|-------------------------|----------------------------|------------------------------------------------|-----------------------------|---------------------------------|
| pDB27210            | 201029                  | Cry21Ba1-like              | 54                                             | Cry21Fa1                    | KF701307                        |
| pDB27104            | 104550                  | -                          |                                                |                             |                                 |
| pDB2743             | 43904                   | -                          |                                                |                             |                                 |
| pDB278              | 8003                    | Cry21Ba1-like              | 49                                             | Cry21Ga1                    | KF771885                        |
| pDB276              | 6525                    | Cry21Ba1-like              | 50                                             | Cry21Ha1                    | KF771886                        |
| pDB275              | 5336                    | -                          |                                                |                             |                                 |
| pDB274              | 4121                    | -                          |                                                |                             |                                 |
